# Supplementary material
Source: HighWire-hosted journal article supplement (https://openres.ersjournals.com/content/8/2/00687-2021)
Supplement: inline-supplementary-material-1 [file inline-supplementary-material-1.pdf]

Online Supplement:

| <b>Online Supplement: Culture Positive for Co-pathogens by Disease</b> |                                   |                                  |                                                       |                                              |                             |                                                                         |
|------------------------------------------------------------------------|-----------------------------------|----------------------------------|-------------------------------------------------------|----------------------------------------------|-----------------------------|-------------------------------------------------------------------------|
| <b>Patient Group</b>                                                   | <b><i>Serratia</i><br/>(n=31)</b> | <b><i>Proteus</i><br/>(n=17)</b> | <b><i>Steno-<br/>tropho-<br/>monas</i><br/>(n=21)</b> | <b><i>Burkholderia<br/>cepacia</i> (n=2)</b> | <b><i>NTM</i><br/>(n=6)</b> | <b>Proportion of<br/>patients growing<br/>1 or more isolate<br/>(%)</b> |
| <b>1. Respiratory Conditions</b>                                       | 8                                 | 4                                | 11                                                    | 2                                            | 6                           | 9.8                                                                     |
| a) Airway Disease                                                      | 5                                 | 3                                | 7                                                     | 0                                            | 1                           | 6.4                                                                     |
| b) CF and Bronchiectasis                                               | 3                                 | 1                                | 4                                                     | 2                                            | 5                           | 35.5                                                                    |
| c) Interstitial Lung Diseases                                          | 0                                 | 0                                | 0                                                     | 0                                            | 0                           | 0.0                                                                     |
| <b>2. Restrictive Chest Wall<br/>Conditions</b>                        | 2                                 | 0                                | 1                                                     | 0                                            | 0                           | 5.6                                                                     |
| <b>3. Diaphragm Palsy</b>                                              | 0                                 | 1                                | 0                                                     | 0                                            | 0                           | 9.5                                                                     |
| <b>4. OHS and OSA</b>                                                  | 1                                 | 2                                | 0                                                     | 0                                            | 0                           | 1.9                                                                     |
| <b>5. Neuromuscular and<br/>Neurological Conditions</b>                | 18                                | 9                                | 8                                                     | 0                                            | 0                           | 10.9                                                                    |
| a) MND                                                                 | 3                                 | 1                                | 0                                                     | 0                                            | 0                           | 7.5                                                                     |
| b) DMD                                                                 | 1                                 | 0                                | 0                                                     | 0                                            | 0                           | 7.7                                                                     |
| c) All other Neuromuscular<br>Disease                                  | 1                                 | 0                                | 2                                                     | 0                                            | 0                           | 3.6                                                                     |
| d) Cerebral Palsy                                                      | 1                                 | 0                                | 1                                                     | 0                                            | 0                           | 10.5                                                                    |
| e) Spinal Cord Injury                                                  | 7                                 | 5                                | 2                                                     | 0                                            | 0                           | 28.9                                                                    |
| f) Other Neurological<br>Conditions                                    | 5                                 | 3                                | 3                                                     | 0                                            | 0                           | 14.7                                                                    |
| <b>6. Other</b>                                                        | 2                                 | 1                                | 1                                                     | 0                                            | 0                           | 13.3                                                                    |

| <b>Appendix 1</b>                                                               |               |
|---------------------------------------------------------------------------------|---------------|
| <b>Disease</b>                                                                  | <b>Number</b> |
| <b>1. Respiratory Conditions</b>                                                |               |
| a) Airway Disease                                                               |               |
| COPD                                                                            | 213           |
| COPD and OSA                                                                    | 4             |
| Asthma                                                                          | 3             |
| b) CF and Bronchiectasis                                                        |               |
| Bronchiectais                                                                   | 17            |
| Cystic Fibrosis                                                                 | 14            |
| c) Interstitial Lung Diseases                                                   |               |
| Idiopathic Pulmoanry Fibrosis                                                   | 2             |
| Idiopathic Bronchiolitis                                                        | 1             |
| Sarcoidosis                                                                     | 1             |
| Pneumocystis Jirovecii Pneumonia/ Acute Respiratory Distress Syndrome/ Fibrosis | 1             |
| <b>2. Restrictive Chest Wall Conditions</b>                                     |               |
| Kyphoscoliosis                                                                  | 50            |
| Arthrogryposis Multiplex Congenita                                              | 2             |
| Chest Wall Abnormality                                                          | 1             |
| Fibrodysplasia Ossificans Progressiva                                           | 1             |
| <b>3. Diaphragm Palsy</b>                                                       |               |
|                                                                                 | 21            |
| <b>4. OHS and OSA</b>                                                           |               |
|                                                                                 | 162           |
| <b>5. Neuromuscular and Neurological Conditions</b>                             |               |
| a) MND                                                                          | 53            |
| b) DMD                                                                          | 26            |
| c) All other Neuromuscular Disease                                              |               |
| Ullrich Congenital Muscular Dystrophy                                           | 2             |
| Bethlem Myopathy                                                                | 5             |
| Becker Muscular Dystrophy                                                       | 4             |
| Central Core Disease                                                            | 1             |
| Congenital Muscular Dystophy                                                    | 8             |
| Congenital Myasthenic Syndrome                                                  | 1             |
| Congenital Myotonic Dystrophy                                                   | 20            |
| Facioscapulohumeral Muscular Dystrophy                                          | 11            |
| Inclusion Body Myositis                                                         | 1             |
| Limb Girdle Muscular Dystrophy                                                  | 7             |
| Distal Myopathy                                                                 | 1             |
| Myasthenia Gravis                                                               | 6             |
| Mitochondrial Myopathy                                                          | 2             |
| Polymyositis                                                                    | 1             |
| Pompe Disease                                                                   | 2             |
| Spinal Muscular Atrophy                                                         | 11            |
| Kennedy's Disease                                                               | 1             |
| Multicore Myopathy                                                              | 2             |
| Myopathy (Respiratory and Proximal limbs)                                       | 1             |
| Muscular Dystrophy                                                              | 14            |
| Nemaline Myopathy                                                               | 2             |
| Titin Myopathy                                                                  | 5             |
| Myofibrillar Myopathy                                                           | 1             |
| Undiagnosed Congenital Myopathy                                                 | 2             |
| d) Cerebral Palsy                                                               | 19            |
| e) Spinal Cord Injury                                                           | 45            |

|                                                                                |    |
|--------------------------------------------------------------------------------|----|
| f) Other Neurological Conditions                                               |    |
| Multiple Sclerosis                                                             | 14 |
| Moebius Syndrome                                                               | 1  |
| Guillain-Barre Syndrome                                                        | 4  |
| Chronic Idiopathic Axonal Polyneuropathy                                       | 1  |
| Chronic Inflammatory Demyelinating Polyneuropathy                              | 1  |
| Demyelinating Neuropathy (monophasic inflammatory condition of unknown origin) | 1  |
| Friedreich Ataxia                                                              | 1  |
| Post-polio Syndrome                                                            | 6  |
| Lewis-Sumner Syndrome                                                          | 1  |
| Spina Bifida                                                                   | 7  |
| Hunter Syndrome                                                                | 1  |
| Lennox-Gastaut Syndrome                                                        | 1  |
| Epileptic Encephalopathy with Hypotonia and Microcephaly                       | 1  |
| Childhood Herpes Simplex Encephalitis                                          | 1  |
| Congenital Central Hypoventilation Syndrome                                    | 2  |
| Japanese Encephalitis                                                          | 1  |
| Transverse Myelitis                                                            | 1  |
| Alexander Disease                                                              | 1  |
| Neuroferritinopathy                                                            | 1  |
| Neuromyelitis Optica                                                           | 2  |
| Huntington's Disease                                                           | 1  |
| Multiple System Atrophy                                                        | 3  |
| Parkinson's Disease                                                            | 1  |
| Progressive Supranuclear Palsy                                                 | 1  |
| Chordoma                                                                       | 1  |
| Spinal cord Infarction                                                         | 1  |
| Chiari Malformation                                                            | 4  |
| Traumatic Brain Injury                                                         | 8  |
| Hypoxic Brain Injury                                                           | 2  |
| Trigeminal Schwannoma/ Craniotomy / Hemiparesis                                | 1  |
| Brain Stem Cerebrovascular Accident                                            | 2  |
| Hereditary Motor Sensory Neuropathy                                            | 1  |
| Other                                                                          |    |
| Post Covid -19                                                                 | 1  |
| Patau Syndrome                                                                 | 1  |
| Trisomy 21                                                                     | 2  |
| Potocki-Lupski Syndrome                                                        | 1  |
| Ventilatory Failure of Unknown Origin                                          | 4  |
| Ventilatory Failure Secondary to Opioids                                       | 2  |
| Global Developmental Delay                                                     | 3  |
| Pitt-Hopkins Syndrome                                                          | 1  |
